# Supplementary material
Source: publisher figshare collection journal article supplement (https://tandf.figshare.com/articles/dataset/_/7380680)
Supplement: Supplementary file 1 [file 1]

SUPPLEMENTARY DATA 1

Journal of Vertebrate Paleontology

A new proteid salamander from the early Oligocene of Romania with notes on the paleobiogeography of Eurasian proteids

MÁRTON VENCZEL1 and VLAD A. CODREA*, 2

1Tării Crişurilor Museum, B-dul Dacia 1-3 RO-410464, Oradea, Romania, mvenczel@gmail.com;

2Babeş-Bolyai University, Department of Geology-Paleontology, 1 Kogălniceanu Str. RO-400084, Cluj-Napoca, Romania, codrea_vlad@yahoo.fr

SUPPLEMENTARY DATA 1

The following supplementary data contains further details about the phylogenetic analyses performed regarding the Romanian early Oliogocene proteid salamander *Mioproteus gardneri* sp. nov. These data include information about data assembly and taxon choice in building the character-taxon matrix (CTM) used in the study. The CTM is derived from that of DeMar (2013), employed by this author to explore the relationships of early proteids (i.e., *Paranecturus garbanii*) among select caudates. The original CTM of DeMar (2013) was built by Denton and O’Neill (1998) and revised latter by Gardner (2000) using 23 characters from a total of 13 taxa (Demar 2013:table1). DeMar (2013) also added several characters to the list of the above authors (9–13, 18, 20, 22, and 24). We added *Mioproteus* *causasicus* and *M. gardneri* to the CTM of DeMar (2013) and removed *Necturus krausei* from the original CTM, because more than 50% of the characters (i.e., the atlantal features) remained unknown for that taxon. We added a single atlantal character to the CTM of DeMar (2013): (14) angle enclosed by the anterior cotylar surfaces of the atlas: about 180º (0); about 225º (1). Furthermore, we have updated the character states of *Proteus anguinus* in the CTM, as follows: (10) alar-like process of the atlantal centrum: present (1) (Haller-Probst and Schleich, 1994:fig. 51); and (24) mediolateral groove on the posterior face of the neural arch spanning between the neural spine and postzygapophyses: absent (0) (Młynarski et al., 1984:fig. 1:2, 4). All the characters are polarized with respect to *Cryptobranchus alleganiensis*, used as outgrup in the parsimony analyses. As reported in the paper, we performed parsimony analyses with the phylogenetic software package TNT version 1.1 (Goloboff et al., 2008).

**Abbreviations**—**D**, DeMar (2013); **DO**, Denton and O’Neill (1998); **G**, Gardner (2000).

LIST OF CHARACTERS

**Atlas**

(1) Relative depth of anterior cotyles: nearly flat to shallowly excavated (0); moderate to deeply excavated (1) (D:1; DO:6; G:4).

(2) Outline of anterior cotyles: subcircular (0); compressed dorsoventrally (1); compressed lateromedially (2) (D:2; DO:4; G:5).

(3) Form of odontoid process: anteriorly elongate knob (0); dorsoventrally flattened and reduced in length (1); dorsoventrally flattened and reduced further to a horizontal bar (2) (D:3; DO:7; G:6).

(4) Position of neural canal relative to anterior cotyles: above (0); partly between (1) (D:4; G:7).

(5) Dorsal outline of posterior margin of neural arch roof: truncate or pointed (0); forked (1) (D:5, DO:8; G:10).

(6) Dorsal outline of neural crest: broadens posteriorly (0); narrows posteriorly (1) (D:6; DO:9; G:11).

(7) Condition of anterior end of neural crest in dorsal view: not emarginated laterally (0); emarginated laterally (1) (D:7; G:12).

(8) Postzygapophyses: prominent and laterally divergent (0); smaller and directed more ventrolaterally (1); weakly developed and does not project ventrally or laterally any

significant distance from the neural arch (D:8; DO:10; G:13).

(9) Condition of articular surface of odontoid process: large (0); small (1); absent (2) (D:9).

(10) Alar-like process of centrum: absent (0); present (1) (D:10).

(11) Lateral flanges of neural arch: absent (0); present (1) (D:11).

(12) Condition of articular surface of odontoid process and anterior cotyles: not confluent (0); confluent (1) (D:12).

(13) Position of odontoid process relative to anterior cotyles: midheight or lower (0); upper one- half (1) (D:13).

(14) Angle enclosed by the anterior cotylar surfaces of the atlas: about 180º (0); about 225º (1) (this paper).

**Trunk Vertebrae**

(15) Form of centrum: amphicoelous (0); semi-opisthocoelous (1); fully opisthocoelous (2) (D:14; DO:11; G:16).

(16) Posterior basapophyses: absent (0); present (1) (D:15; DO:13, 14; G:17).

(17) Anterior basapophyses: absent (0); present (1) (D:16; DO:13, 14).

(18) Position of ventral margin of subcentral keel in lateral view of middle trunk vertebrae relative to ventral margin of anterior and posterior cotyles: above (0); approximately in line

(1); below (2) (D:17).

(19) Height of neural spine: low (0); high (1) (D:18; DO:16; G:18).

(20) Height of neural crest of middle trunk vertebrae: low, gently rises posteriorly onto base of neural spine (0); moderate in height, rises at a more pronounced angle posteriorly relative

to dorsal surface of neural arch roof (1); high, rises at a pronounced angle and is equal to or greater than the height of the neural spine (2) (D:19).

(21) Form of transverse process: bicipitate and appressed (0); bicipitate and divergent (1); unicipitate (2) (D:20; DO:17; G:19).

(22) Form of transverse process and condition of lateral ends of rib-bearer(s) of middle trunk vertebrae: bicipitate with dorsal and ventral rib-bearers hollow (0); bicipitate with dorsal

rib-bearer solid and ventral rib-bearer hollow (1); unicipitate and solid (2) (D:21).

(23) Condition of neural spine: finished in cartilage (0); finished in bone (1) (D:22; DO:19; G:20).

(24) Mediolateral groove on the posterior face of the neural arch spanning between the neural spine and postzygapophyses: absent (0); present (1) (D:23).

LITERATURE CITED

DeMar, D. G., Jr. 2013. A new fossil salamander (Caudata, Proteidae) from the Upper Cretaceous (Maastrichtian) Hell Creek Formation, Montana, U.S.A. Journal of Vertebrate Paleontology 33:588–598.

Denton, R. K., Jr., and R. C. O’Neill. 1998. *Parrisia neocesariensis*, a new batrachosauroidid salamander and other amphibians from the Campanian of eastern North America. Journal of Vertebrate Paleontology 18:484–494.

Gardner, J. D. 2000. Systematics of albanerpetontids and other lissamphibians from the Late Cretaceous of western North America. Ph.D. dissertation, University of Alberta, Edmonton, Alberta, 577 pp.

Goloboff, P. A., J. S. Farris, and K. C. Nixon. 2008. TNT, a free program for phylogenetic analysis. Cladistics 24:774–786.

Haller-Probst, M., and H. H. Schleich. 1994. Vergleichende osteologische Untersuchungen an einigen Urodelen Eurasiens (Amphibia: Urodela, Salamandridae, Proteidae). Courier Forschungsinstitut Senckenberg 173:23–77.

Młynarski, M., Z. Szyndlar, R. Estes, and B. Sanchíz. 1984. Amphibians and reptiles from the Pliocene locality of Węże II near Działoszyn (Poland). Acta Palaeontologica Polonica 29:209–226.
